# Supplementary material for: Non-Pharmacological Interventions for Type 2 Diabetes in People Living with Severe Mental Illness: Results of a Systematic Review and Meta-Analysis
Source: MDPI journal article supplement (doi:10.3390/ijerph21040423), 2024-03-30
Supplement: s1 [file s1]

Non-pharmacological interventions for type 2 diabetes in people living with severe mental illness: Results of a systematic review and meta-analysis – Supplementary Tables

Table S1. Search syntax

| <i>Search within</i>                     | <i>Search terms</i>                                                                                                                                                                                                         |
|------------------------------------------|-----------------------------------------------------------------------------------------------------------------------------------------------------------------------------------------------------------------------------|
| ABS-TITLE-KEYWORDS                       | schizophrenia OR schizoaffective OR “schizoaffective disorder” OR bipolar OR “bipolar disorder” OR psychosis OR “major depress*” OR “SMI” OR “severe mental illness” OR “severe mental disease” OR “severe mental disorder” |
| AND                                      |                                                                                                                                                                                                                             |
| TITLE                                    | diabetes OR “diabetes mellitus” OR “diabetes mellitus type 2” OR “diabetes type 2” OR “type 2 diabetes”                                                                                                                     |
| AND                                      |                                                                                                                                                                                                                             |
| ABS-TITLE-KEYWORDS                       | non-pharmacological OR lifestyle OR exercise OR physical OR diet* OR nutrition* OR psycho* OR cognitive OR behaviour* OR intervention OR therapy OR activity OR trial OR management                                         |
| No time or language restriction applied. |                                                                                                                                                                                                                             |

Table S2. Eligibility criteria

|                              | <b>Include</b>                                                                                                                                                                                     | <b>Exclude</b>                                                                                                                                                                                                                    |
|------------------------------|----------------------------------------------------------------------------------------------------------------------------------------------------------------------------------------------------|-----------------------------------------------------------------------------------------------------------------------------------------------------------------------------------------------------------------------------------|
| Patient problem / Population | Patients with types 2 diabetes and SMI;<br><br>18 years and over                                                                                                                                   | Pre-diabetes, Gestational diabetes, people without diabetes, patients with type 1 diabetes<br><br>Patients with mental health problems other than SMI: e.g., depression, anxiety, eating disorder, smoking and alcohol abuse etc. |
| Intervention                 | Non-pharmacological interventions targeted at diabetes management in people with SMI – Diet, exercise, other lifestyle, educational and behavioural interventions, and/or change to care delivery. | Medication intervention, mixed interventions including new medication in combination with lifestyle/behaviour interventions                                                                                                       |
| Comparison or control        | Studies involving a comparator (usual care/practice, medication,                                                                                                                                   | Case studies                                                                                                                                                                                                                      |

|          |                                                                                                                                                                                                                                                                                                                                                                                                          |  |
|----------|----------------------------------------------------------------------------------------------------------------------------------------------------------------------------------------------------------------------------------------------------------------------------------------------------------------------------------------------------------------------------------------------------------|--|
|          | other non-pharmacological intervention or waiting list) or studies with multiple time points of data in the same study population                                                                                                                                                                                                                                                                        |  |
| Outcomes | <ul style="list-style-type: none"> <li>• Primary outcomes:</li> <li>• Glycaemic Control: Glycated haemoglobin, fasting blood glucose</li> <li>• Psychiatric symptoms</li> <li>• Quality of Life (QoL)</li> <li>• Secondary outcomes:</li> <li>• Lipid profile – LDL, HDL, Triglycerides, Total Cholesterol</li> <li>• Economic Cost</li> <li>• Body mass index</li> <li>• Hospital admissions</li> </ul> |  |
